# Supplementary material for: MicroRNA-141 suppresses prostate cancer stem cells and metastasis by targeting a cohort of pro-metastasis genes
Source: Springer Nature journal article supplement (doi:10.1038/ncomms14270), 2017-01-23
Supplement: 41467_2017_BFncomms14270_MOESM3696_ESM.pdf [file 41467_2017_BFncomms14270_MOESM3696_ESM.pdf]

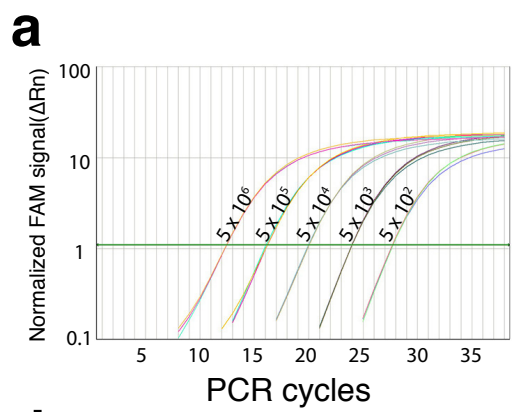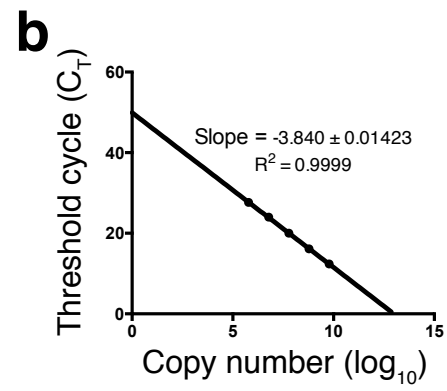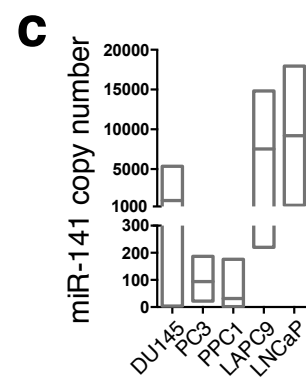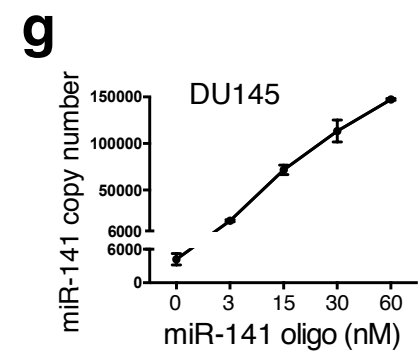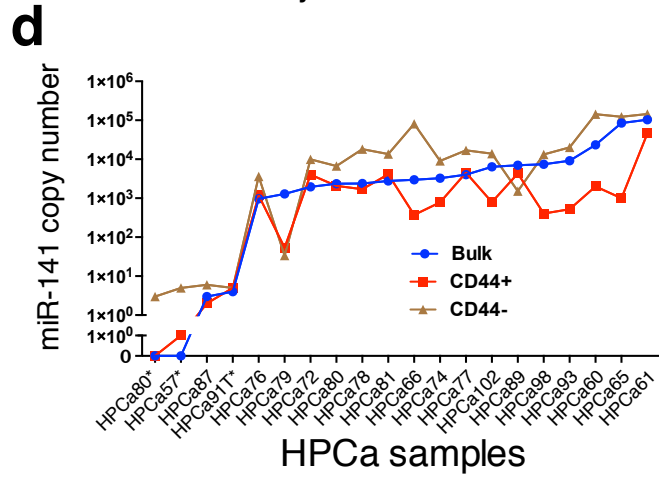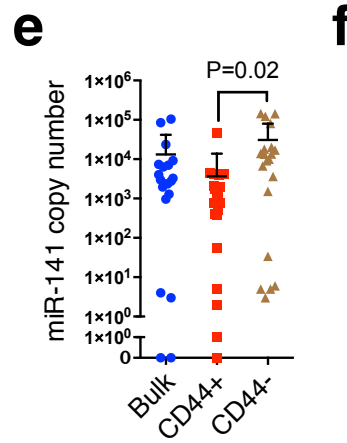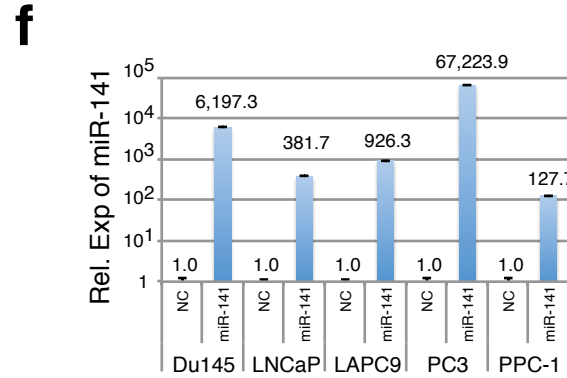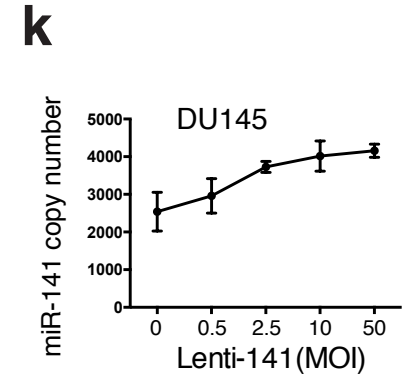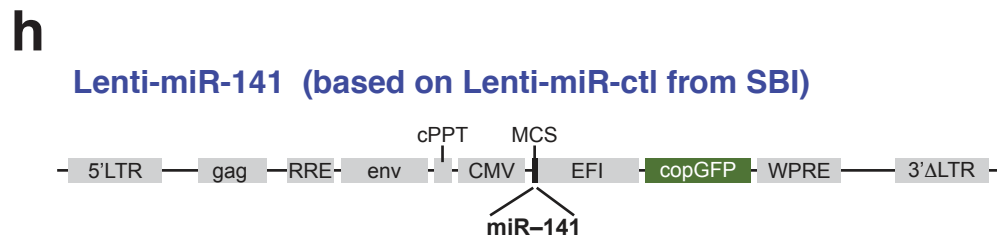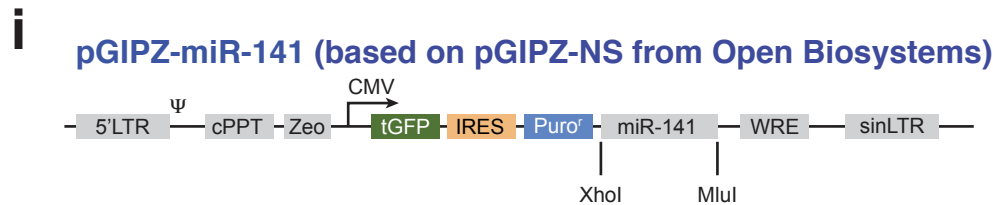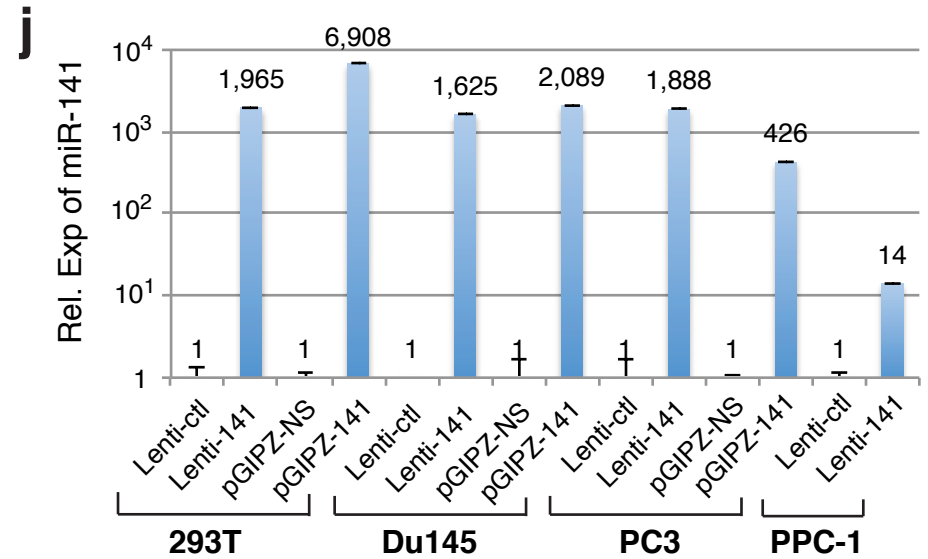

## **Supplementary Figure 1. Quantification of endogenous and overexpressed miR-141.**

Related to Fig. 1.

- a-b. Amplification plots of synthetic miR-141. Copy numbers were determined by the weight and amount of synthetic miR-141 (<http://www.endmemo.com/bio/dnacopynum.php>). Shown in b is the standard curve of miR-141 in which  $C_T$  values were plotted against copy numbers.
- c. Estimated endogenous miR-141 copy numbers in 5 PCa cell types, i.e., DU145 (n=11 independent experiments with triplicate samples in each measurement; copy numbers ranged from 4-5351 copies/cell), PC3 (n=3; 22-187 copies/cell), PPC-1 (n=6; 21-76 copies/cell), LNCaP (n=4; 220-14,837 copies/cell), and LAPC9 (n=2; 448-17,940 copies/cell).
- d-e. Estimated miR-141 copy numbers in 20 HPCa patient tumor-derived bulk and CD44<sup>+</sup>/CD44<sup>-</sup> cells (also see Fig. 1c). Shown in e is the summary of the miR-141 copy numbers (bulk, 0-103,800 copies/cell; CD44<sup>+</sup>, 0-46,015; CD44<sup>-</sup>, 3-145,074 copies/cell).
- f. qPCR quantification of miR-141 in PCa cells transfected with miR-141 or NC oligos. RNU48 was included as the internal control. Bars represent the mean  $\pm$  SD (n=3 independent experiments)
- g. Dose –dependent increase in miR-141 copy numbers in DU145 cells transfected with increased concentration of transfected oligos. Copy numbers were estimated from the standard curve (see Supplementary Fig. 1a). Bars represent the mean  $\pm$  SD (n=3 independent experiments)
- h. Schematic of the lentiviral vector (i.e., Lenti-141) to over-express miR-141. A 316 bp sequence harboring the miR-141 stem loop (95 bp) together with flanking regions (upstream 96 bp and downstream 125bp) is cloned into the XbaI and NotI sites of the vector (System Biosciences). The empty vector was used as control (i.e., Lenti-ctl).
- i. Schematic of lentiviral vector (i.e., pGIPZ-141) for over-expressing miR-141. The same 316 bp sequence harboring the miR-141 stem loop is cloned into the XhoI and MluI sites of the pGIPZ lentiviral vector (Open Biosystems). The same vector with a non-silencing 'shRNA-Mir' sequence (i.e., pGIPZ-NS) was the control vector.
- j. qPCR quantification of miR-141 in PCa cells (293T cells used as a control cell type) infected with control vectors or miR-141 encoding lentiviruses in cells harvested at 72 h post infection. The relative miR-141 expression levels are indicated. Bars represent the mean  $\pm$  SD (n=3).
- k. Copy numbers of miR-141 in DU145 cells infected with the Lenti-141 viruses at the indicated MOI. Bars represent the mean  $\pm$  SD (n=3).

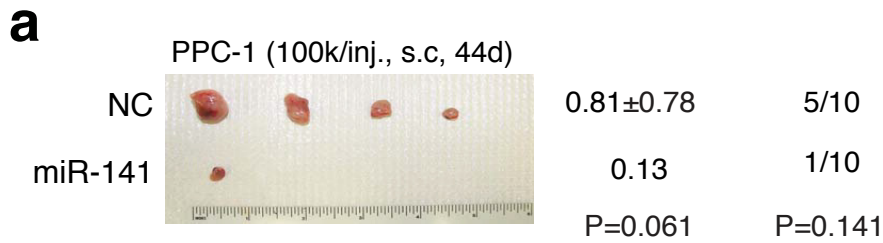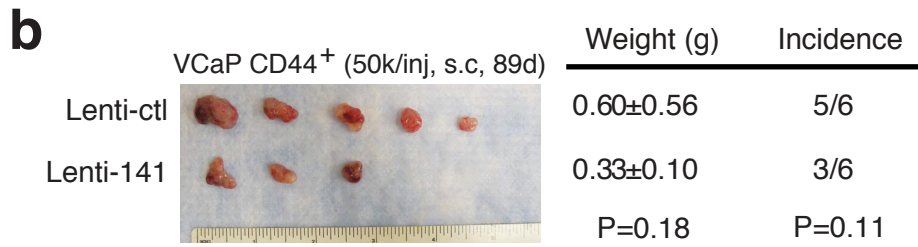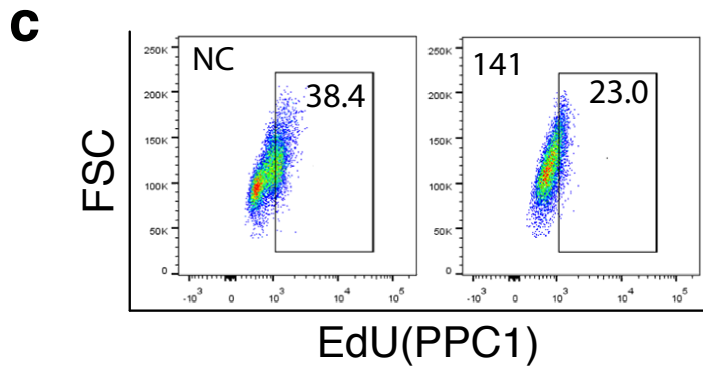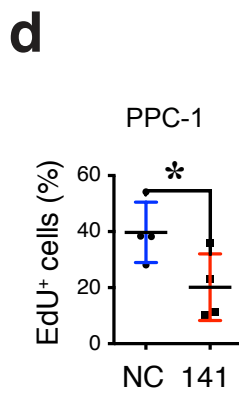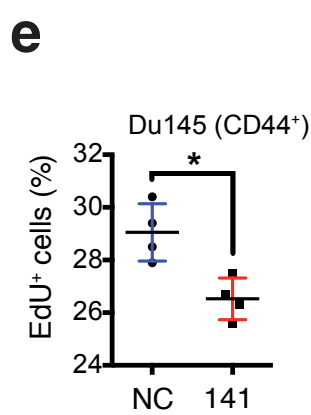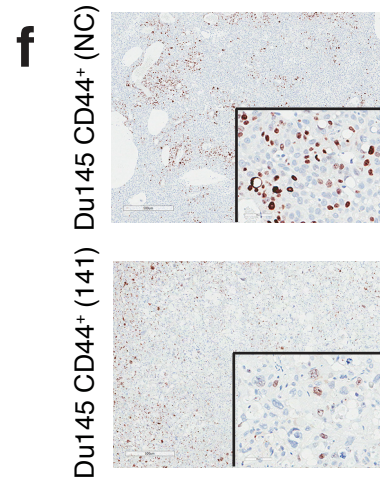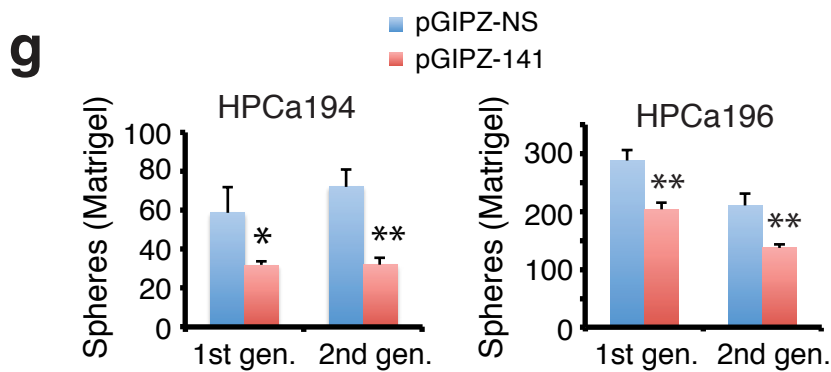

**Supplementary Figure 2. Tumor- and proliferation-inhibitory effects of miR-141.**

Related to Fig. 1.

- a. miR-141 inhibits PPC-1 tumor development. Mean weight (mean  $\pm$  SD), tumor incidence as well as the P values for mean weight and incidence are indicated.
- b. miR-141 inhibits VCaP tumor regeneration from purified CD44<sup>+</sup> cells. Mean tumor weight (mean  $\pm$  SD), tumor incidence (tumor outgrowth/total injection number) as well as the P values are indicated.
- c-e. miR-141 inhibits proliferation of PCa cells measured by EdU incorporation assays. c&d, EdU incorporation assays in bulk PPC-1 cells. Shown are a representative flow histogram (c) and quantification of EdU<sup>+</sup> cells (d; bars represent the mean  $\pm$  SD; n=5). i, miR-141 inhibits EdU incorporation in CD44<sup>+</sup> DU145 cells (bars represent the mean  $\pm$  SD; n=3).
- f. Ki-67 IHC staining in representative endpoint tumors derived from the DU145 CD44<sup>+</sup> cells transfected with NC (top) or miR-141 (141; bottom) oligos, respectively (also see Fig. 1g). Similar differences were observed in DU145 Lenti-141/Lenti-ctl (Fig. 1i) and in PPC-1 Lenti-141/Lenti-ctl (Fig. 1j) tumors.
- g. Sphere formation assays in two primary patient tumor-derived cells (i.e., HPCa194 and HPCa196) over-expressing miR-141. Values represents mean  $\pm$  SD (n=3 independent experiments). \*P<0.05, \*\*P<0.01. For the second generation, spheres from the first generation were harvested and digested with Collagenase and Trypsin into single cells and re-infected with pGIPZ-NS/pGIPZ-141 lentivirus (MOI 10; 48 h).

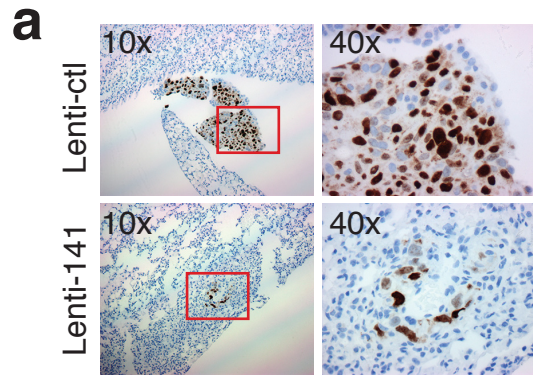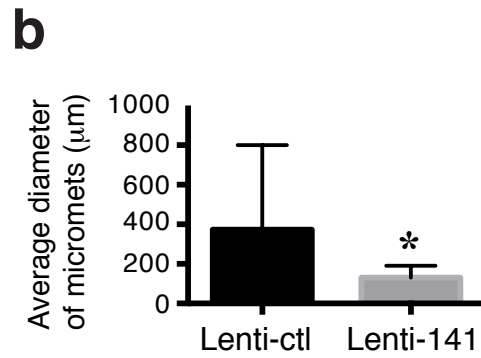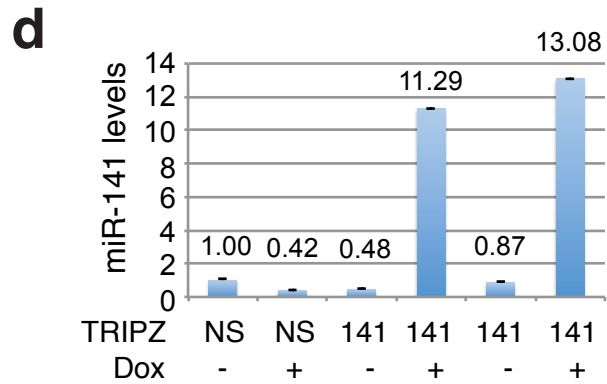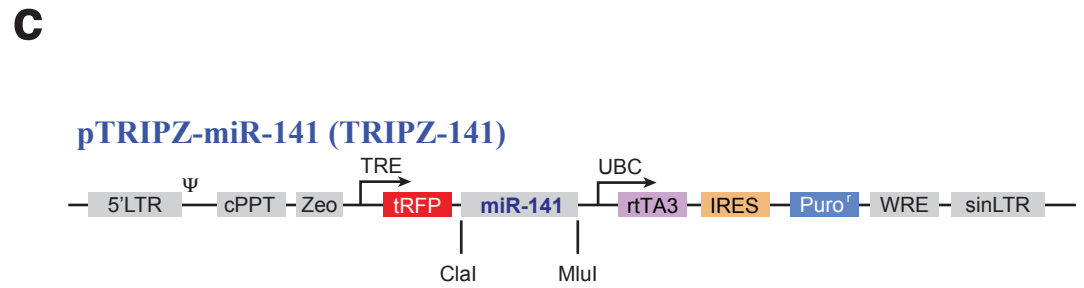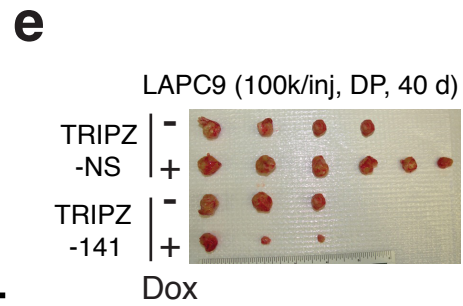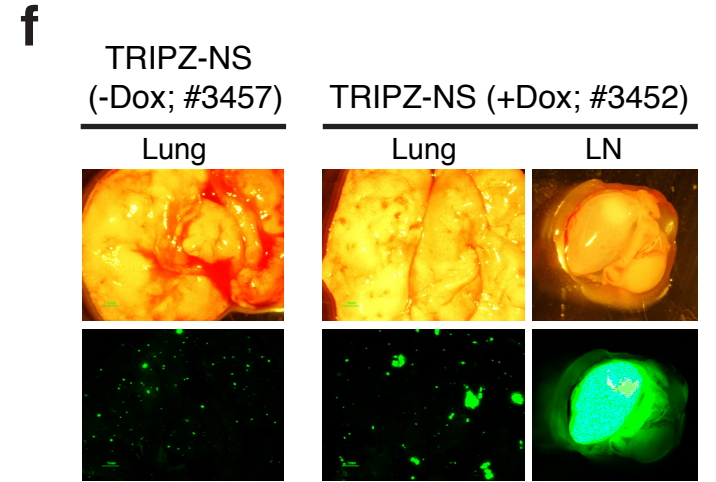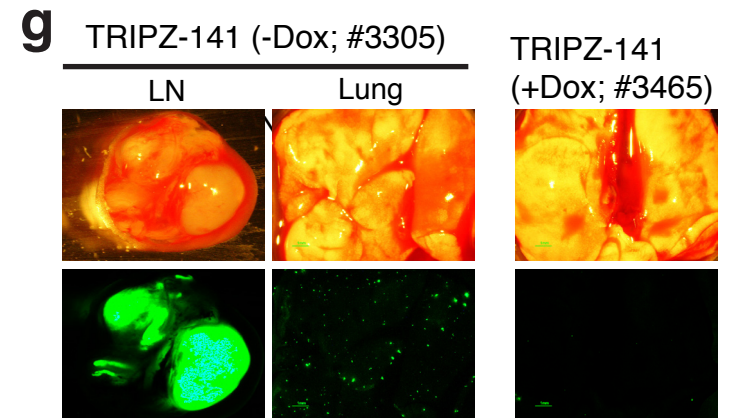

**Supplementary Figure 3. *miR-141* inhibits PCa metastasis.** Related to Fig. 2.

- a-b. miR-141 inhibits the lung metastasis of CD44<sup>+</sup> DU145 cells. Shown in b are representative IHC images of human-specific Ki-67 staining. Shown in the bar graph (b) is the quantification of average diameter of micro-metastases in the lung for each group (n=3-5; \*P<0.05).
- c. Schematic of the Dox-inducible pTRIPZ-miR-141 lentiviral expression system (TRIPZ-141). The same 316 bp sequence as in Lenti-141 was cloned into the ClaI and MluI sites of the pTRIPZ inducible lentiviral vector (Open Biosystems).
- d. qPCR quantification of miR-141 in DU145 cells infected with inducible TRIPZ-141 or TRIPZ-NS (non-silencing control) vector (MOI 5) with or without doxycycline (Dox; 2 µg/ml, 72 h). Relative miR-141 expression levels compared with TRIPZ-NS without Dox induction were indicated above each bar. Values represents mean± SD (n=3 independent experiments).
- e. Dox-inducible expression of miR-141 suppresses LAPC9 tumor growth. 16 days post tumor cell implantation, Dox treatment (200 mg/kg body weight in feed) was initiated. Tumor incidence, mean weight and P values are presented as a bar graph in Fig. 2g.
- f. Representative lung and lymph node (LN) images (top, phase; bottom, GFP) in TRIPZ-NS animals with or without Dox. Animal numbers (#) are indicated in the parentheses. Note that the numbers of GFP<sup>+</sup> metastatic foci in the TRIPZ-NS/-Dox vs. TRIPZ-NS/+Dox lungs were not significantly different although in the example shown the TRIPZ-NS/+Dox lung the GFP<sup>+</sup> foci appeared to cluster together to form larger foci.
- g. Representative lung and LN images (top, phase; bottom, GFP) in TRIPZ-141 animals with or without Dox. Animal numbers are indicated in the parentheses. Note that the TRIPZ-141/+Dox lung showed much less GFP<sup>+</sup> foci than the TRIPZ-141/-Dox lung (also see Fig. 2i for quantification).

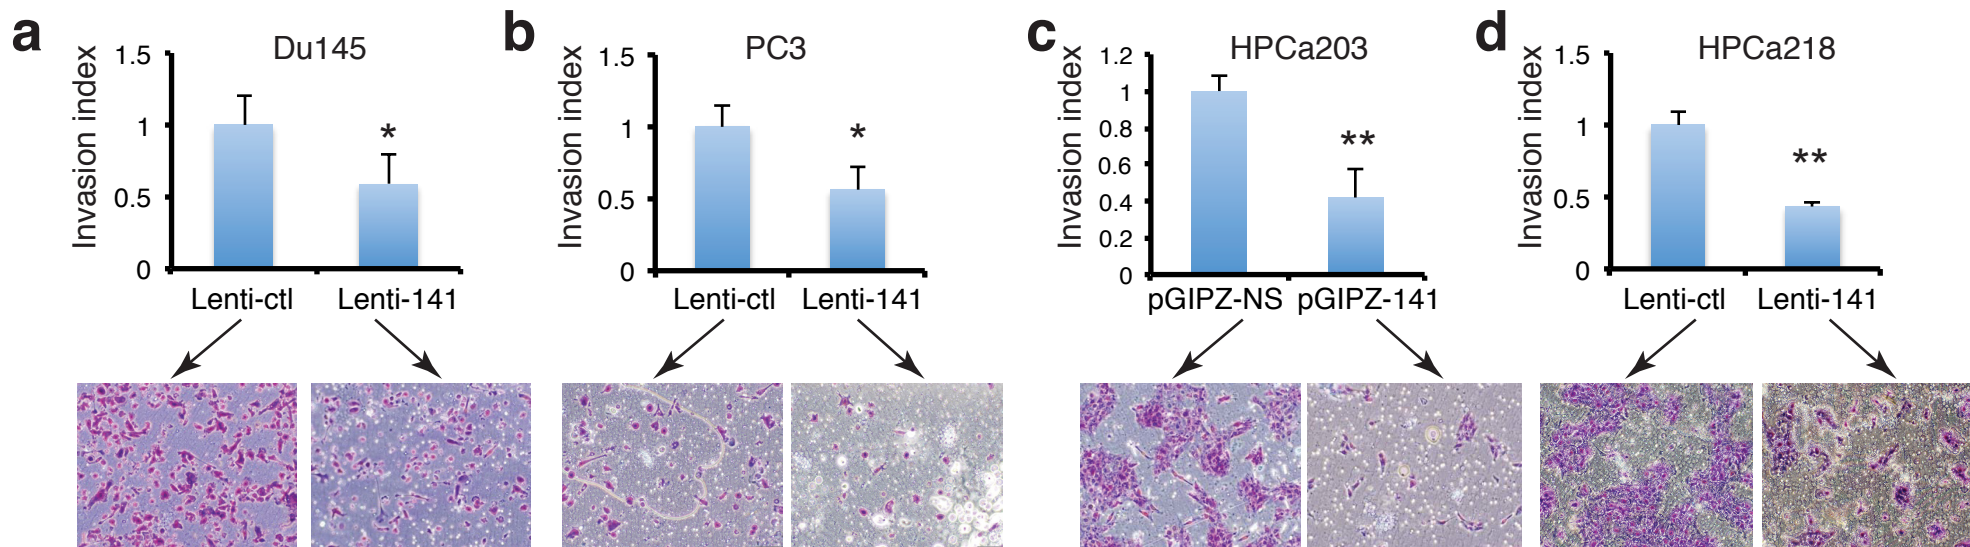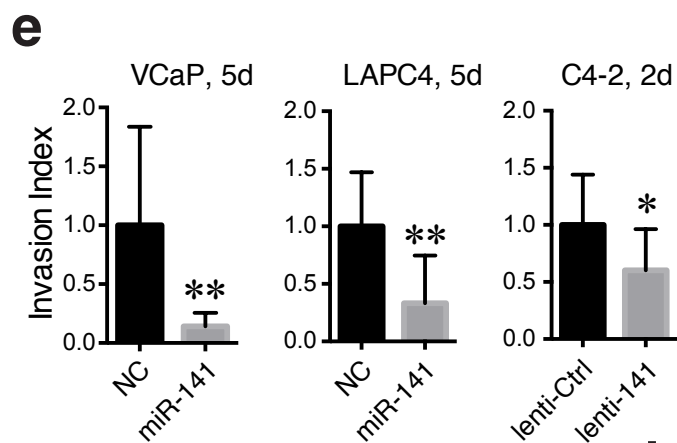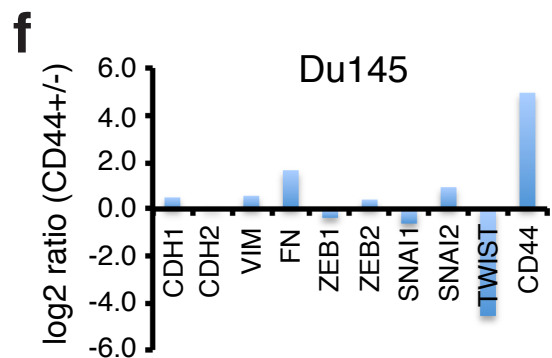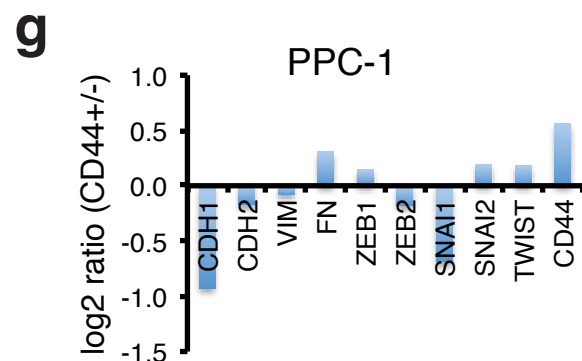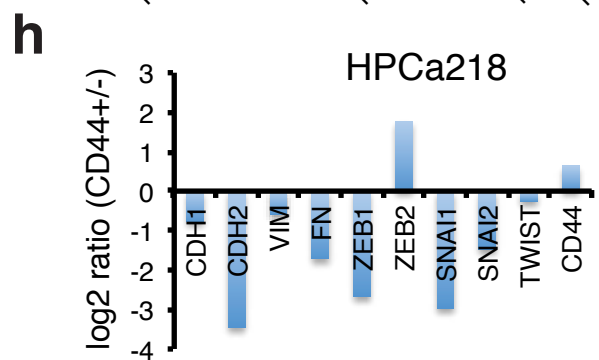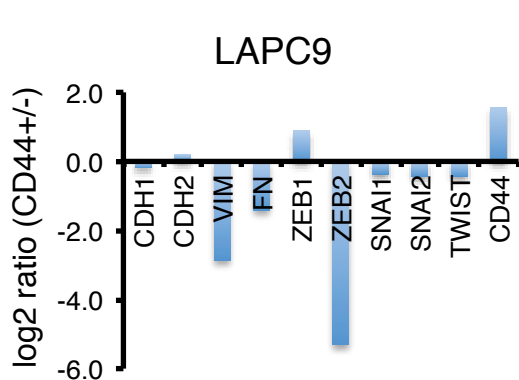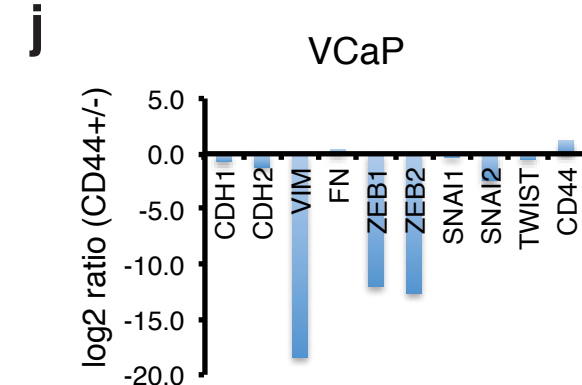

**Supplementary Figure 4. *miR-141* inhibits PCa cell invasion.** Related to Fig. 3.

- a-e. Overexpression of miR-141 suppresses invasion of AR<sup>-</sup> PCa cells (a and b), primary patient tumor-derived HPCa cells (c and d), as well as AR<sup>+</sup> PCa cells (e). DU145 (a) and PC3 (b), as well as two primary patient tumor (HPCa203 and HPCa218; c and d) derived cells were infected with Lenti-141 or Lenti-ctl (MOI 10; 48 h) and then used in Matrigel invasion assays. Representative images were shown below. For 3 AR<sup>+</sup> PCa cell types, cells were transfected with NC or miR-141 oligos (30 nM) for 5 days (5d), 5d and 2d, respectively, followed by scoring invaded cells 48 h later. Bars, mean±SEM (n=3 independent experiments). \*P<0.05; \*\*P<0.01.
- f-j. qPCR analysis of 9 EMT marker genes in CD44<sup>+</sup>/CD44<sup>-</sup> cells purified from 2 PCa cell cultures (e & f), 2 xenografts (g & h) and 1 primary patient tumor sample (i). The expression levels of individual genes were presented as the log<sub>2</sub> ratio in CD44<sup>+</sup> cells over the corresponding CD44<sup>-</sup> cells.



**a**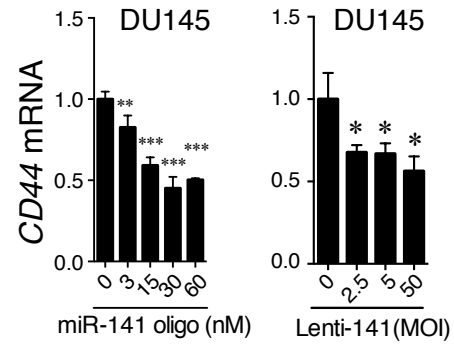**b**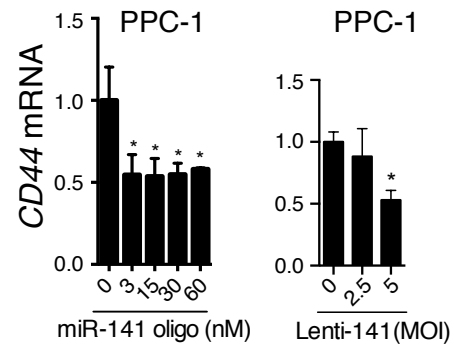

**Supplementary Figure 5. *miR-141* inhibits *CD44* mRNA.** Related to Fig. 3.

*CD44* mRNA levels were reduced in DU145 (a) and PPC-1 (b) cells transfected with *miR-141* mimics (left) or infected with Lenti-141 vectors (right). The oligo concentrations and the infection MOI were indicated below. Shown were the relative *miR-141* levels 72 h after transfection or infection compared to untransfected or uninfected cells (n=3-4 independent experiments). \*P<0.05; \*\*P<0.01; \*\*\*P<0.001.

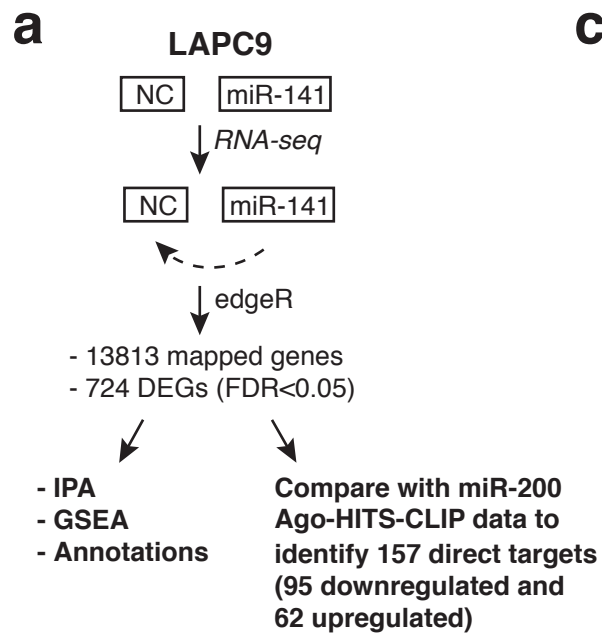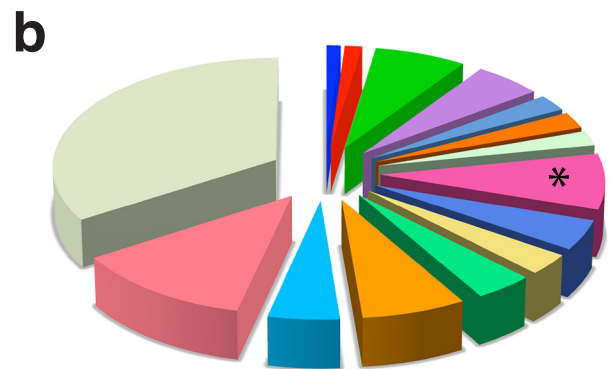

- Androgen-responsive & AR-regulated genes
- Anti-stress response & detoxification
- Apoptosis & senescence
- Chromatin remodeling & epigenetic regulators
- DNA damage response & genome stability
- Inflammation & immune related
- Intermediate metabolism
- Metastasis-associated (proteases, invasion, migration, adhesion, angiogenesis, ECM, etc)
- Neural & neuronal development
- Prostate functions
- RNA biology & ribosome biogenesis
- Signal transduction
- Stem cells & development
- Transcription & nuclear factors
- Others

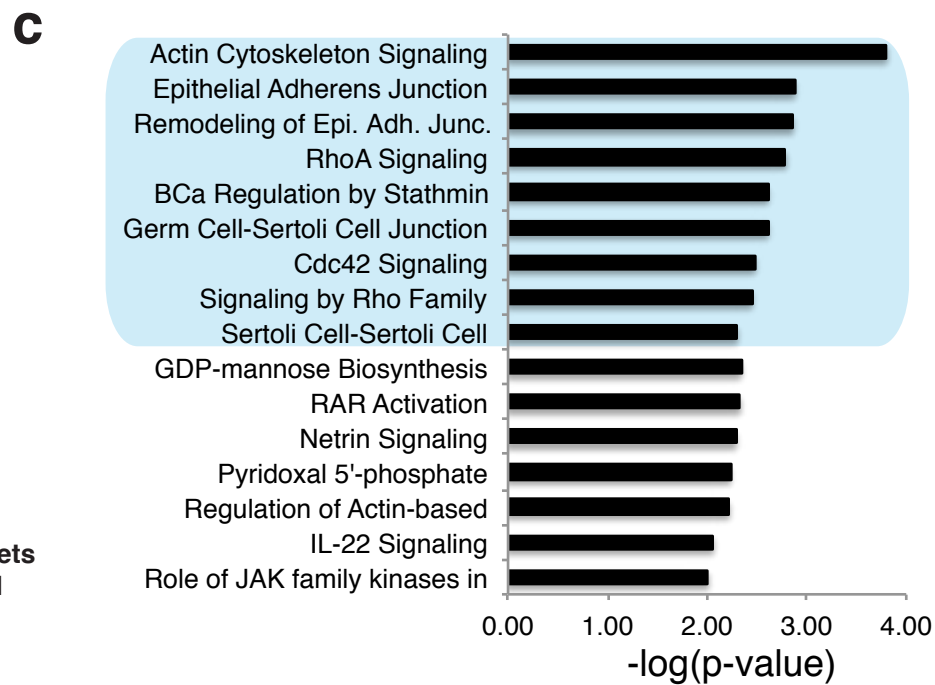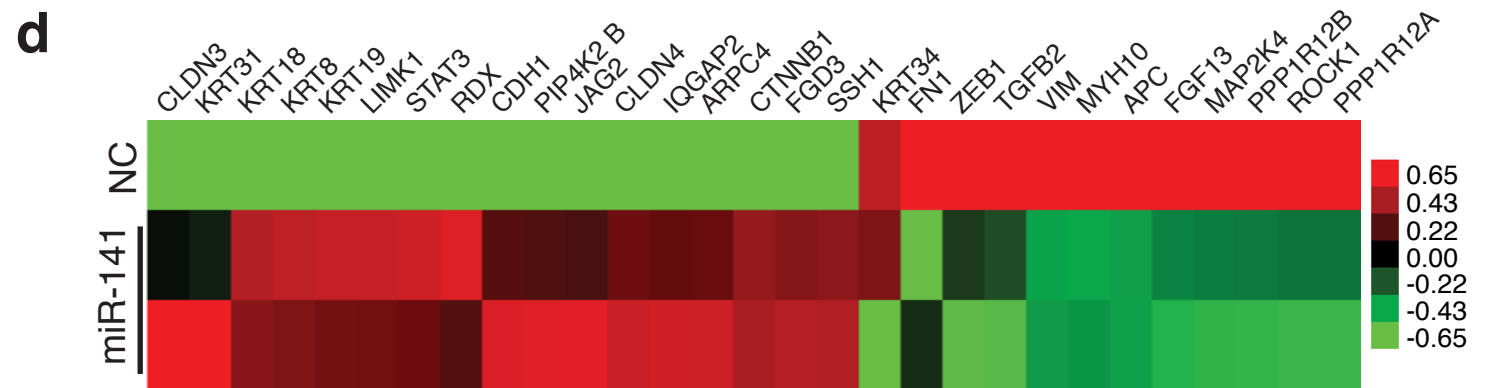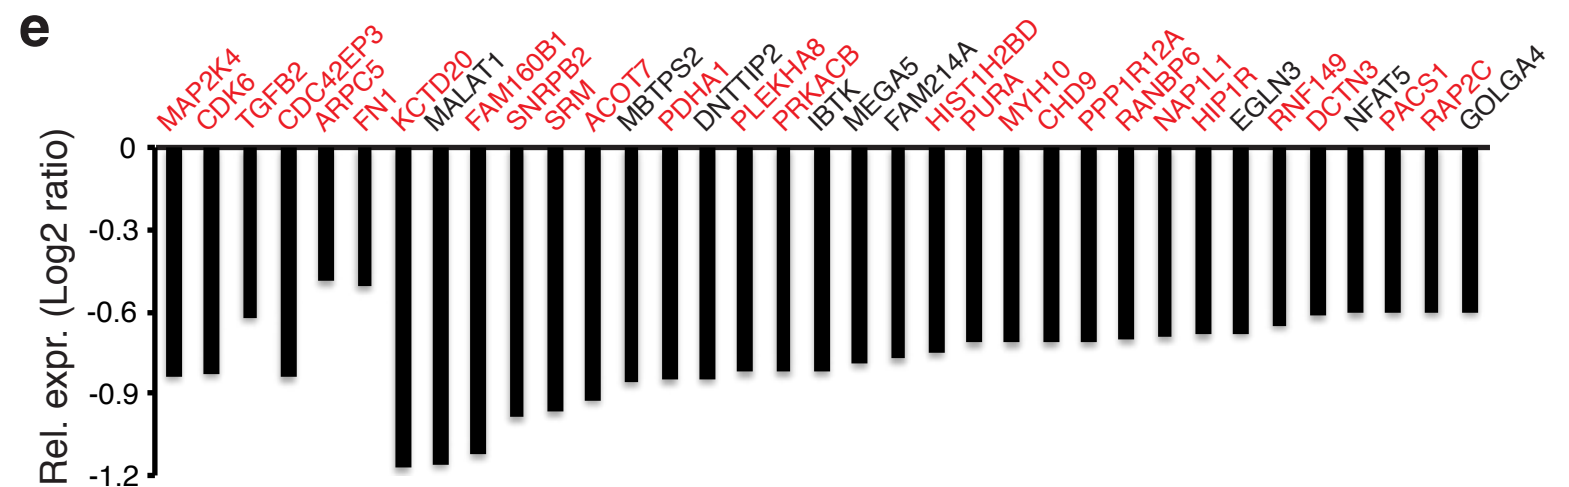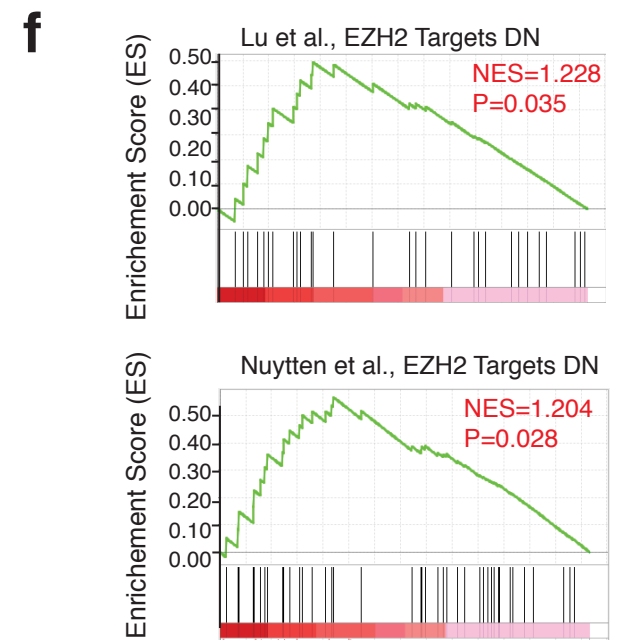

**Supplementary Figure 6.** *miR-141 enforces epithelial phenotype and targets a cohort of migration/invasion/metastasis related genes in LAPC9 cells.* Related to Fig. 4.

- a. Experimental scheme of RNA-Seq in LAPC9 cells and subsequent data analysis.
- b. Functional classification of the 459 genes downregulated by miR-141 in LAPC9 cells. The non-redundant functional classification was conducted as in Fig. 4h. Note that the gene category classified as the “Metastasis-associated” represents one of the largest affected by miR-141.
- c. IPA revealed that miR-141 impacted pathways involving Rho GTPases, and actin cytoskeleton, cell-cell junction, and EMT signaling.
- d. Heat map of representative EMT-related molecules in the LAPC9 RNA-Seq experiment.
- e. The top 35 putative direct targets of miR-141 as revealed by merging LAPC9 RNA-Seq data with the miR-200 Ago-HITS-CLIP data. Bars represent the relative expression levels of each gene from RNA-Seq. Targets that are shared with the putative direct targets in DU145 cells are colored in red.
- f. Two “EZH2 Targets Downregulated” (DN) gene sets positively correlated with the miR-141 expressing LAPC9 gene expression profile.

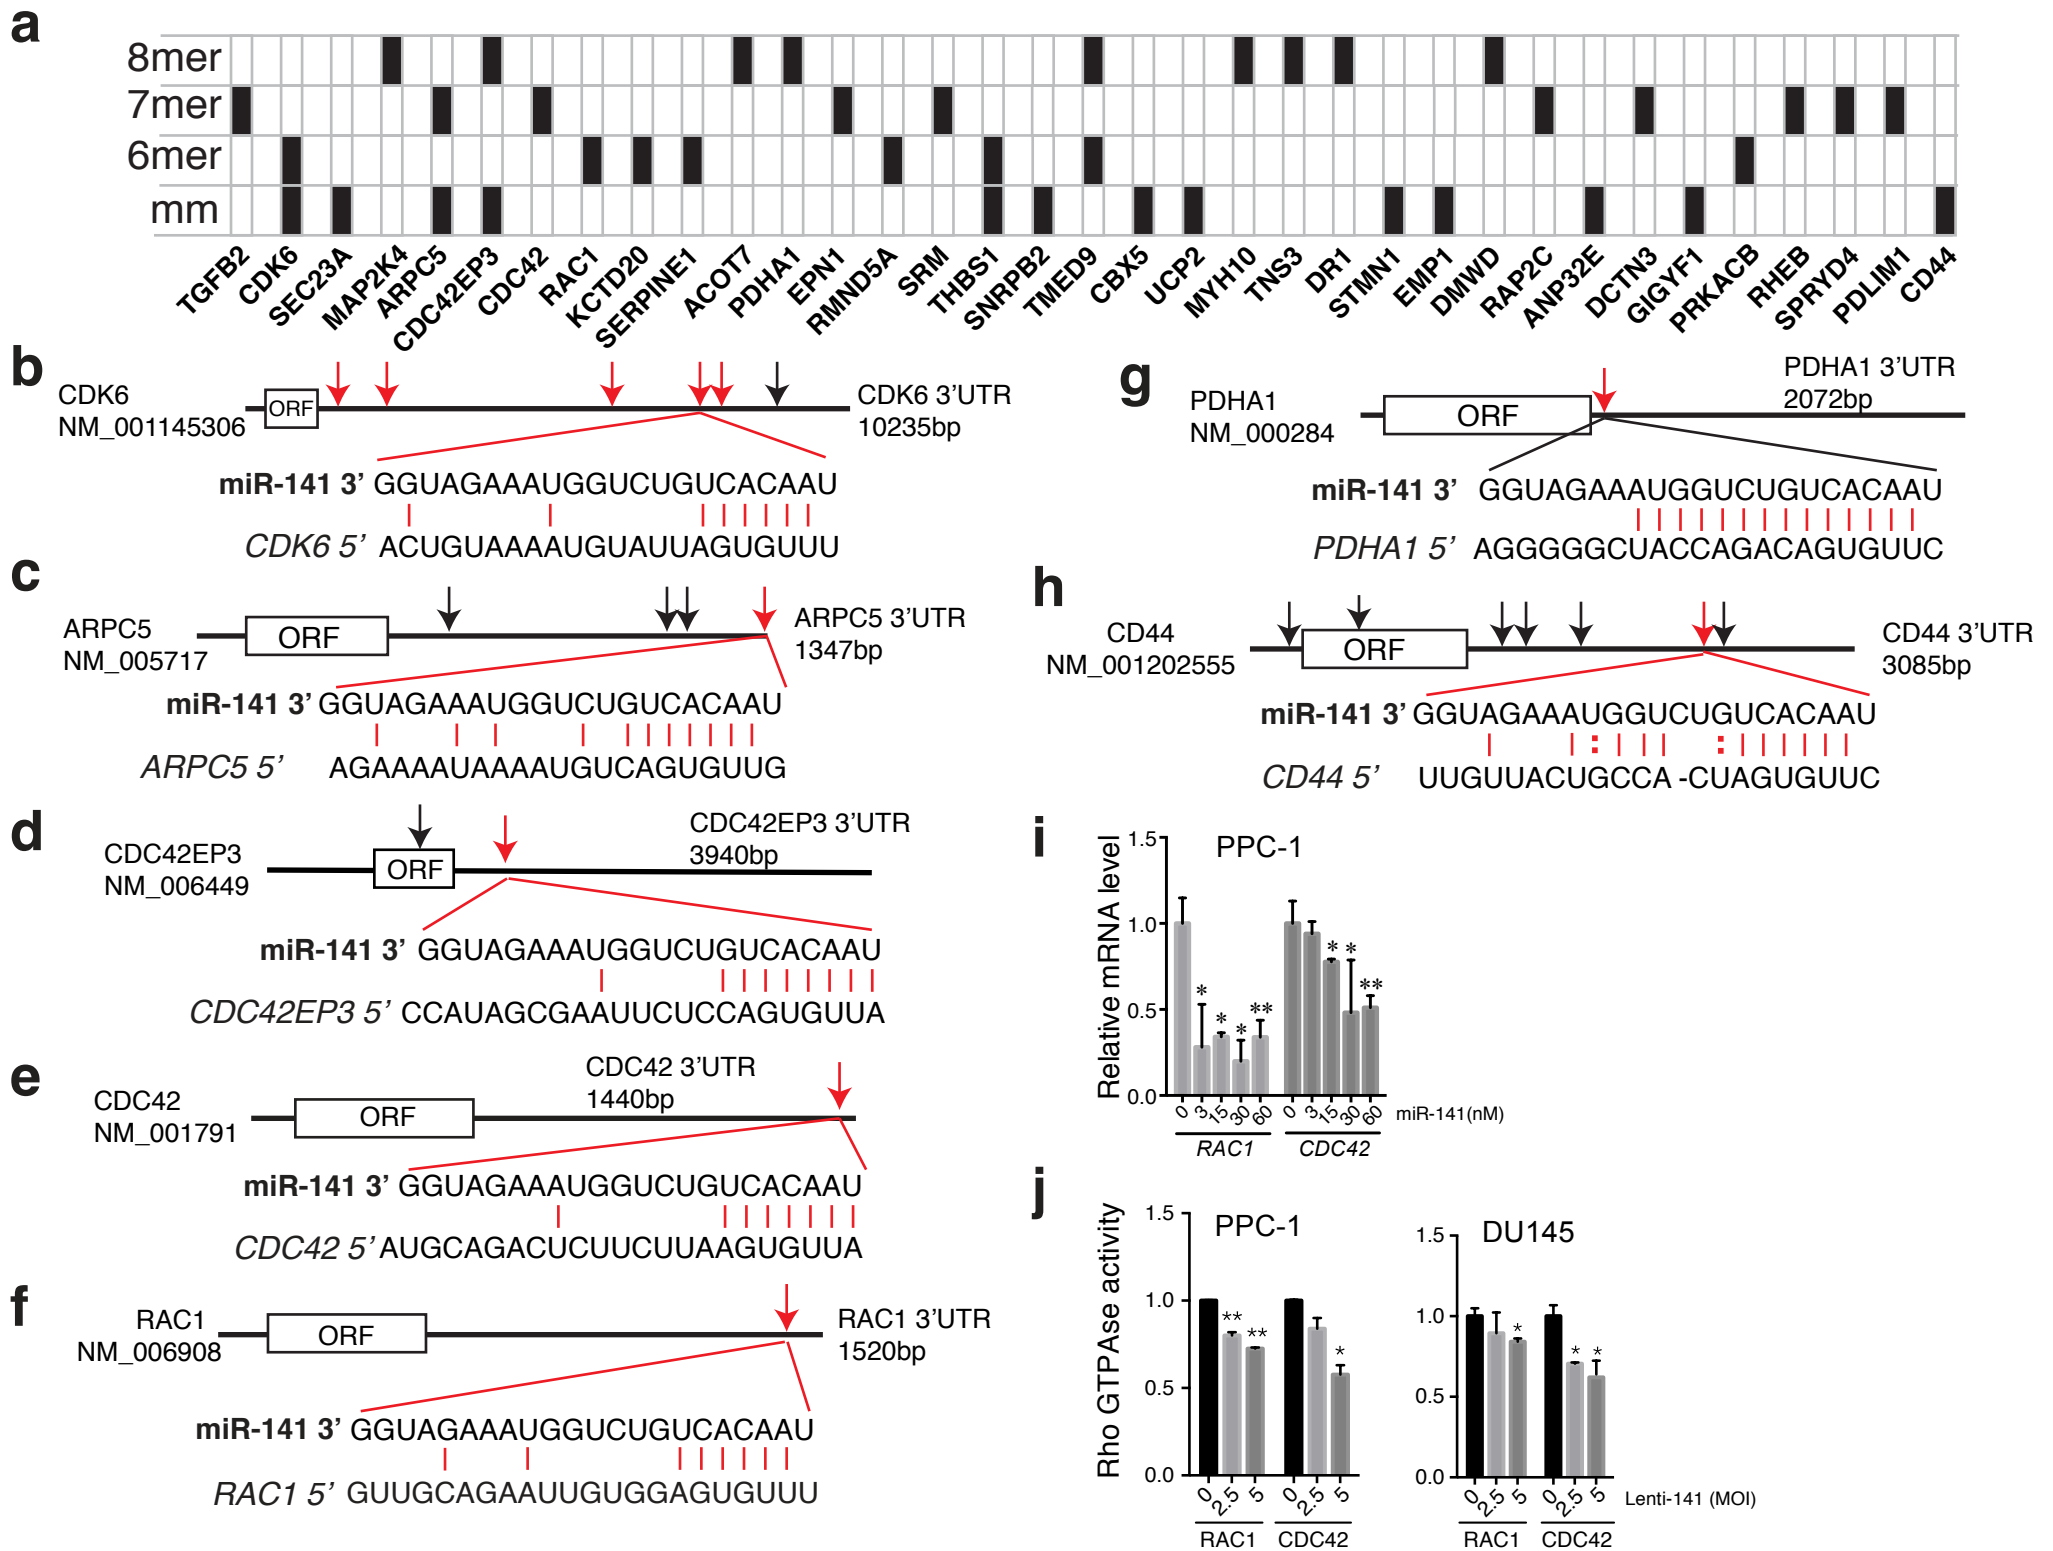

**Supplementary Figure 7. miR-141 is predicted to directly target many molecules related to cell motility, invasion, and metastasis in PCa cells.** Related to Fig. 4 & Fig. 5.

- a. By merging our RNA-Seq data in DU145 cells with the miR-200 Ago-HITS-CLIP results ([https://bitbucket.org/sacgf/bracken\\_hits-clip\\_2013](https://bitbucket.org/sacgf/bracken_hits-clip_2013)) (see Methods), we identified 532 transcripts (263 down- and 269 up-regulated) that have binding sites to miR-200a/miR-141 (Supplementary Data 2). Presented here is the histogram of the top 35 putative direct target molecules of miR-141 (also see Fig. 4I) with the putative miR-141 binding sites indicated by vertical filled solid bars. 8mer, 7mer, and 6mer represent the 8-bp, 7-bp, and 6-bp binding sites, respectively, in the target genes that perfectly match the miR-141 seed sequence whereas 'mm' refers to the target binding site(s) (8mer, 7mer, or 6mer) that have a mismatch to the miR-141 seed sequence.
- b-h. Shown are several examples of novel direct miR-141 targets identified, including cell-cycle related (CDK6, b), Rho GTPase related (ARPC5, CDC42EP3, CDC42, and RAC1; c-f), metabolism related (PDHA1; g), and CD44 (h). The black arrows indicate putative binding site(s) with a mismatch while the red arrows the perfectly matched target sites with its sequence alignment shown below. For example, the *TGFB2* mRNA has one perfectly matched 7mer binding site for miR-141 (a) whereas the *CDK6* 3'-UTR harbors 5 perfectly matched 6mer binding sites (a; b, red arrows. The sequence for one is shown below) and 1 mismatched 8mer binding site (b; black arrow). For *CD44* (a), there is one 7mer miR-141 binding site at the 3'-UTR that contains a mismatch (h, red arrow; also see Fig. 3d) and 6 other potential binding sites with a mismatch in each at the 3'-UTR or ORF (h, black arrows). For each gene, the NM number and the length of the 3'-UTR are indicated.
- i-j. qPCR of *RAC1* and *CDC42* in PPC-1 cells over-expressing miR-141 with either oligo at low concentrations (i.e., 3 and 15 nM) or lenti-virus at low MOI. Bars represent the mean  $\pm$  SD (n=3 independent experiments). \*P<0.05; \*\*P<0.01.
- k. miR-141 inhibits Rho GTPase activities of RAC1 and CDC42 in PCa cells. PPC-1 (left) and DU145 (right) cells were infected with Lenti-141 at low MOI (i.e., 2.5 and 5) and 72 h later cells were harvested for Rho GTPase activity assays. Bars represent the mean  $\pm$  SD (n=2). \*P<0.05; \*\*P<0.01.

**a**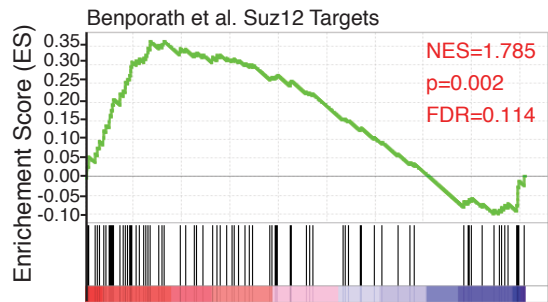**b**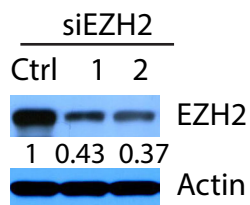**d**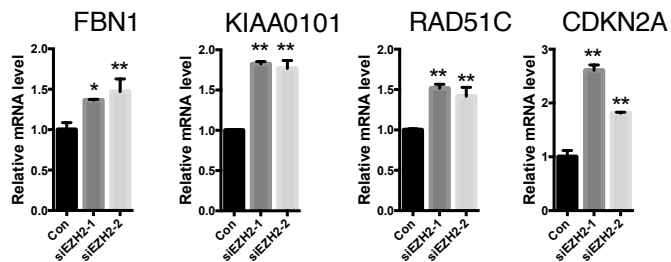**e**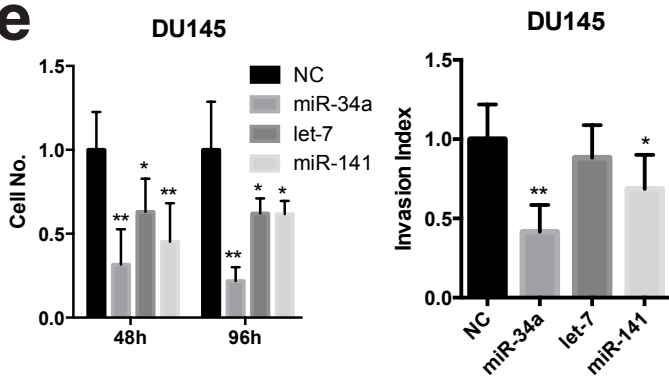**f**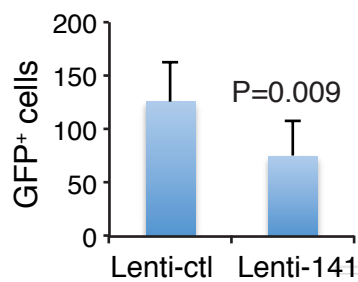**g**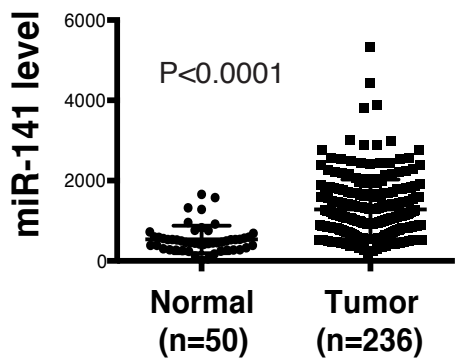**h**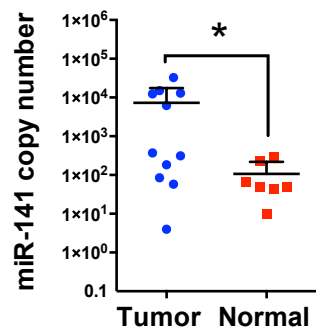**j**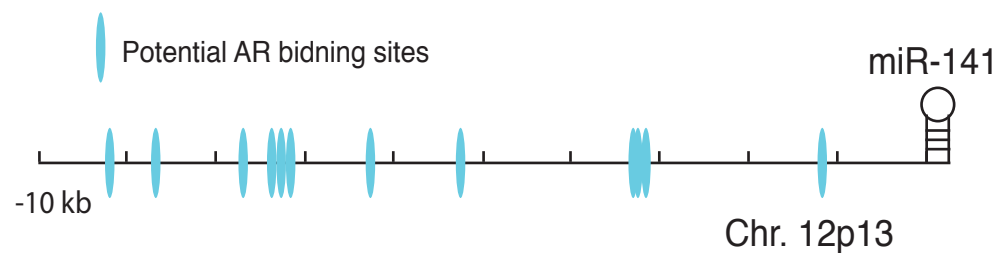**c**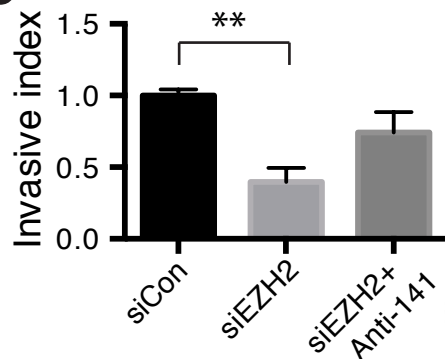**i**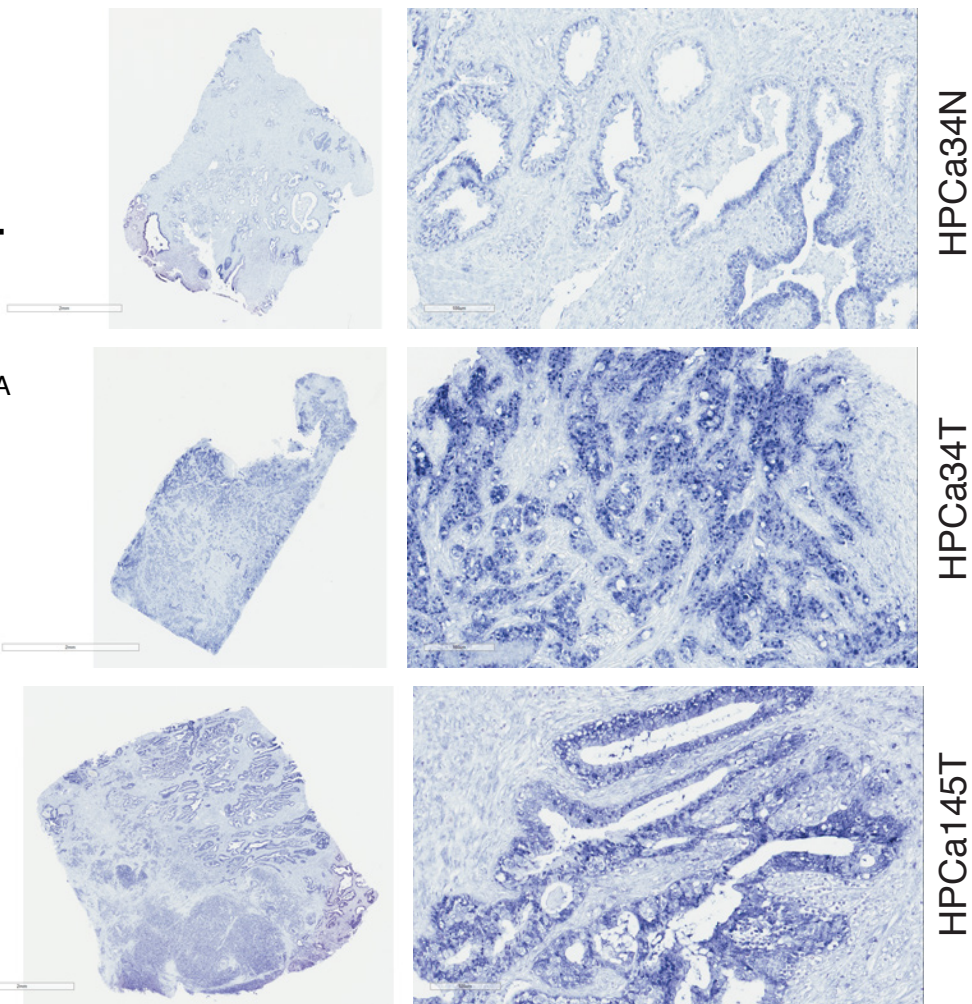

**Supplementary Figure 8. *miR-141* is overexpressed in patient prostate tumors. Related to Fig. 6 & Discussion.**

- a. GSEA showing the enrichment of miR-141 downregulated genes in the SUZ12 Targets gene set.
- b. Western blotting showing the knockdown efficiency of EZH2 proteins in DU145 cells.
- c. EZH2 knockdown inhibits PCa cell invasion, which can be partially overcome by anti-141. Bars, mean±SD (n=4). \*\*P<0.01.
- d. qPCR of 4 EZH2 target genes (i.e., *FBN1*, *KIAA0101*, *RAD51C*, and *CDKN2A*) in DU145 cells transfected with siEZH2-1 or siEZH2-2 (20 nM). Bars, mean±SD (n=3). \*P<0.05; \*\*P<0.01.
- e. Side-by-side comparison of the effects of miR-34a, let-7b (let-7), and miR-141 on cell viability (left) and invasion (right) in DU145 cells. Presented on the left are live cell numbers. Bars, mean±SD. \*P<0.05; \*\*P<0.01.
- f. miR-141 overexpression reduces circulating tumor cells (CTCs) in tumor-bearing animals. FACS-purified CD44<sup>+</sup> DU145 cells were infected with Lenti-ctl or Lenti-141 and cells were then injected into DP of NOD/SCID mice (1.5 x 10<sup>6</sup> cells/injection). Mice were terminated on day 56 when 1 ml of whole blood was collected by cardiac puncture into K3-EDTA-coated tubes (BD Bioscience, Vacutainer) to analyze CTCs. GFP<sup>+</sup> DU145 cells were analyzed using FACS together with control blood from a mouse without orthotopic tumor cell injection. A total of 7 mice from Lent-ctl and 6 mice from Lenti-141 group were analyzed and presented in the bar graph are the GFP<sup>+</sup> cells/100,000 total cells analyzed (y-axis).
- g. miR-141 levels (reads per million miRNA mapped) in the TCGA PRAD data set containing normal (n= 50) and prostate tumor (n=236) samples. P value is indicated above.
- h. miR-141 copy numbers were estimated from total RNA prepared from 11 untreated HPCa samples and 7 matched normal/benign samples (tumors, 4-32,598 copies/cell; normal, 44-298 copies/cell). \*P<0.05.
- i. In situ hybridization (ISH) of miR-141 using pre-designed miRCURY Locked nucleotide acid (LNA) probes (Exiqon) in formalin-fixed, paraffin-embedded HPCa sections including paired benign (HPCa34N) and tumor (HPCa34T) tissues of HPCa34 (top and middle panels), as well as tumor sections from patient HPCa145 (bottom panels). Left panels, 4x; right panels, 40x.
- j. Putative AR binding sites upstream (-10 kb) of the *miR-141* genomic locus on Chromosome 12p13, as predicted by the MetInspector program.



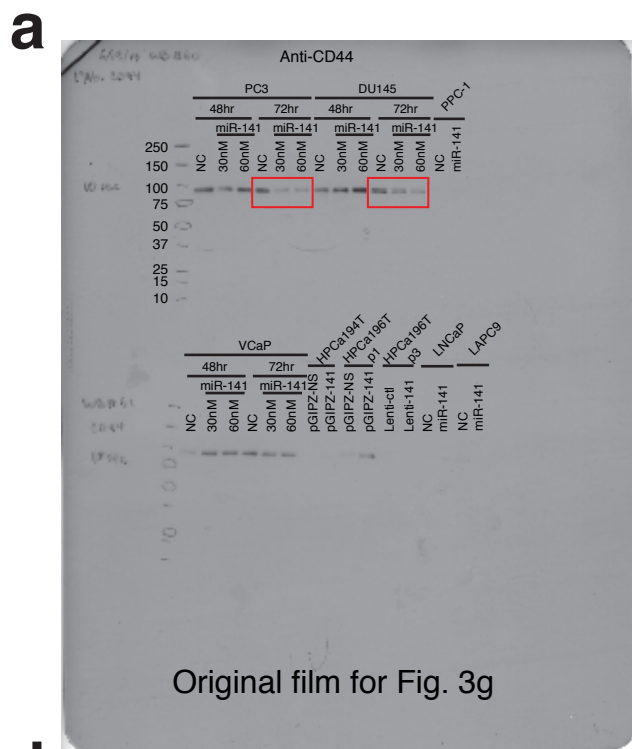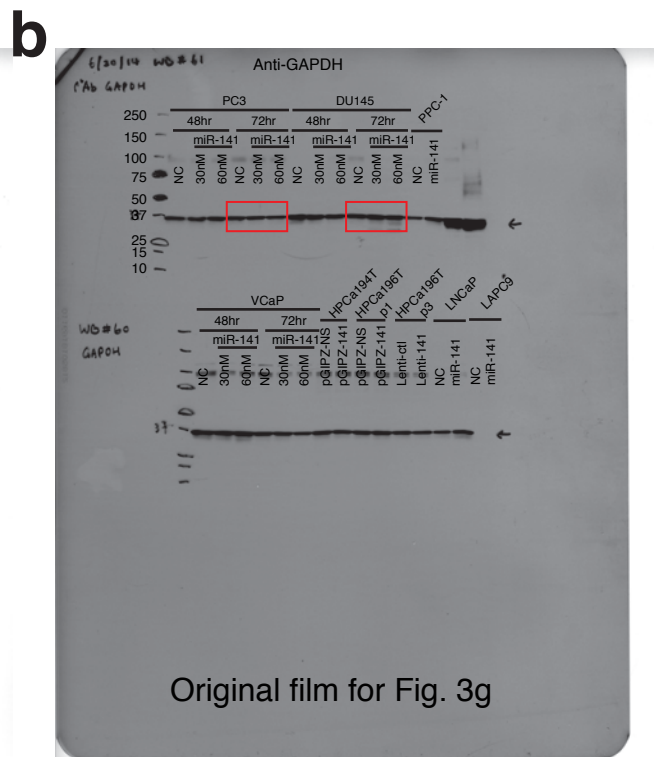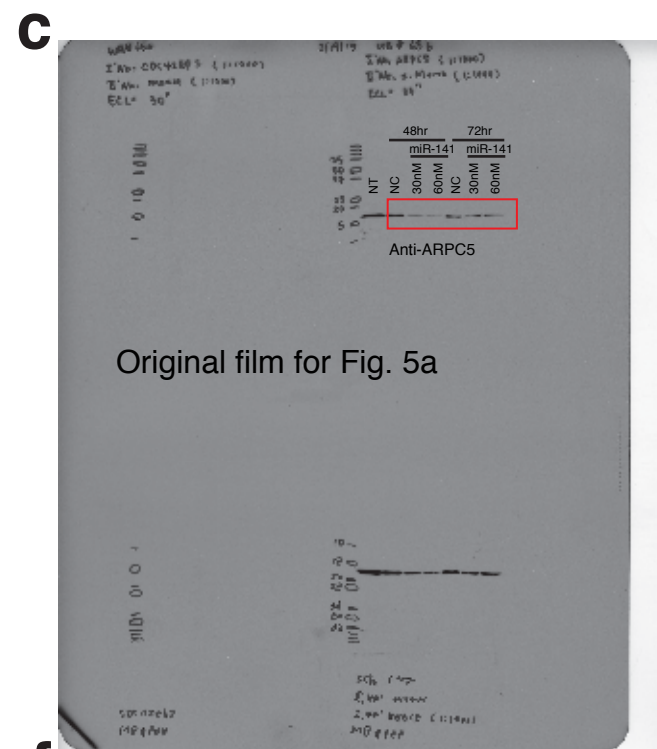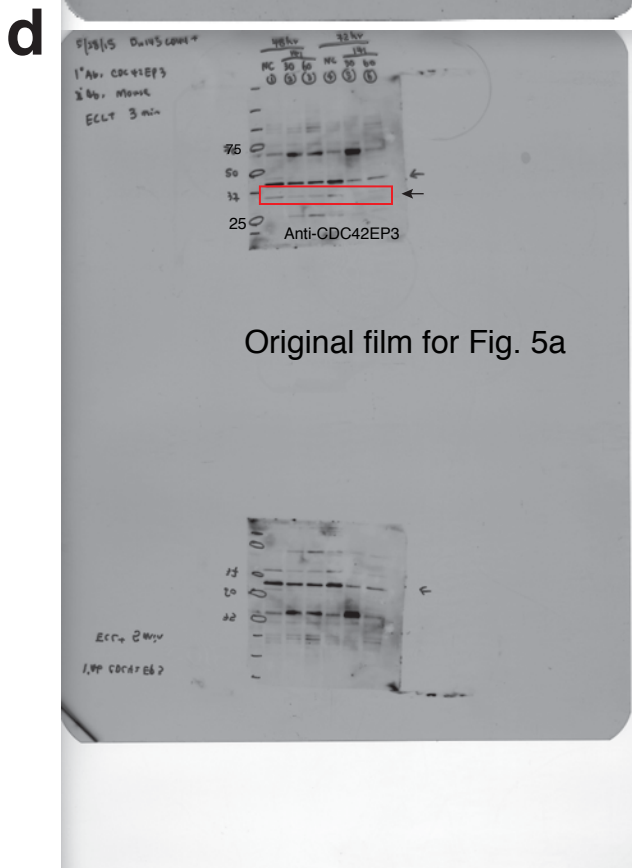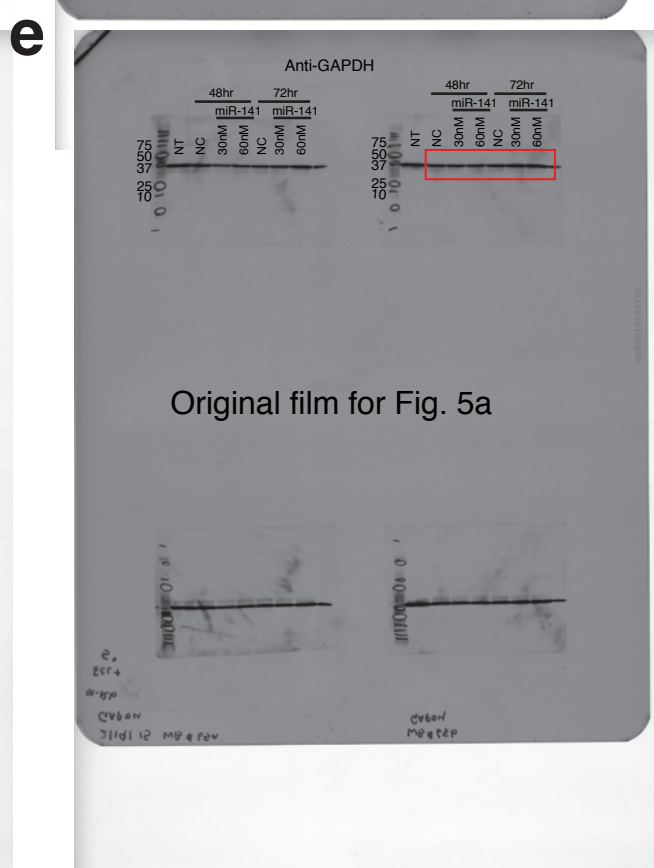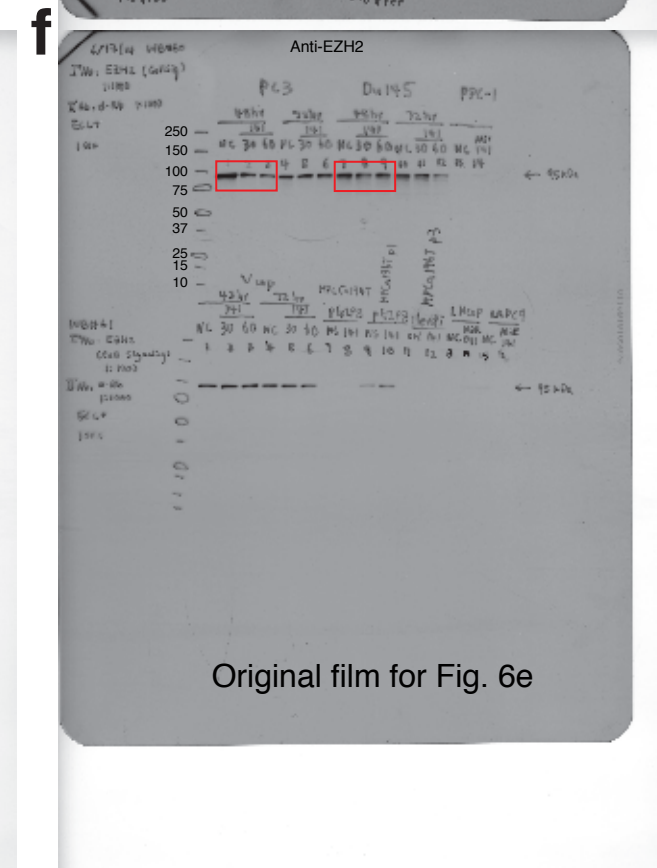

**Supplementary Figure 9.** *Representative full films showing several targets of miR-141.*

- a-b. miR-141 reduces CD44 protein levels in PC3 and DU145 cells 72 h after transfection (a). Shown in b is the GAPDH loading control. For both CD44 and GAPDH, the bands in boxed rectangles were presented in Fig. 3g.
- c-e. miR-141 reduces ARPC5 (c) and CDC42EP3 (d) protein levels in DU145 cells 48 h and 72 h after transfection. Shown in e is the GAPDH loading control. For all three proteins, the bands in boxed rectangles were presented in Fig. 5a. NT, non-transfected.
- f. miR-141 reduces EZH2 protein levels in PC3 and DU145 cells 48 h after transfection. The bands in boxed rectangles were presented in Fig. 6e.

## Supplementary Table 1. Primers used in this study.

### Taqman Primers from Life Technologies.

| Primer/Probe Name | Catalog number                                       |
|-------------------|------------------------------------------------------|
| Has-miR-141       | 4427975 (ID 000463)                                  |
| RNU48             | 4427975 (ID 001006) [control primer for Has-miR-141] |
| CD44              | 4331182 (ID Hs01075861_m1)                           |
| CDH1              | 4331182 (ID Hs01023894_m1)                           |
| CDH2              | 4331182 (ID Hs00983056_m1)                           |
| EZH2              | 4331182 (ID Hs00544833_m1)                           |
| Fibronectin 1     | 4331182 (ID Hs00365052_m1)                           |
| GAPDH             | 4331182 (ID Hs99999905_m1)                           |
| SNAIL1            | 4331182 (ID Hs00195591_m1)                           |
| SNAIL2            | 4331182 (ID Hs00950344_m1)                           |
| SUZ12             | 4331182 (ID Hs00248742_m1)                           |
| TWIST1            | 4331182 (ID Hs01675818_s1)                           |
| VIMENTIN          | 4331182 (ID Hs00185584_m1)                           |
| ZEB1              | 4331182 (ID Hs00232783_m1)                           |
| ZEB2              | 4331182 (ID Hs00207691_m1)                           |

### Other primers

| Primers Name                                           | Sequence (5' to 3')                                                                        |
|--------------------------------------------------------|--------------------------------------------------------------------------------------------|
| CD44 miR-141 binding site mutagenesis primer           | GTGTTGTTACTGCCACGGCGCGCAAGTGCCTCTTGTTTTCCAGA                                               |
| CD44 miR-141 binding site mutagenesis primer Antisense | TCTGGGAAAACAAGAGGCACTTGCCGCGCCGTGGCAGTAACAACA<br>C                                         |
| EZH2 miR-141 binding site mutagenesis primer           | TGTACCATACTGCATTATTGCAAAAATTCCTGGTACAATTGTGATA<br>GCAGCTGGTGAGAAGGCAATAAAAAGTTGATTTTTAAAC  |
| EZH2 miR-141 binding site mutagenesis primer Antisense | GTTTAAAAATCAACTTTTTATTGCCTTCTCACCAGCTGCTATCACAA<br>TTGTACCAGTGAATTTTTGCAATAATGCAGTATGGTACA |
| Rac1 Forward                                           | ACTGTCCCAACACTCCCATC                                                                       |
| Rac1 Reverse                                           | CAGAGGACTGCTCGGATCG                                                                        |
| CDC42 Forward                                          | GACAGATTACGACCGCTGAGT                                                                      |
| CDC42 Reverse                                          | ACTTGACAGCCTTCAGGTCA                                                                       |

**Supplementary Table 2. Primary human PCa (HPCa) samples used in this study.**

| HPCa sample <sup>a</sup> | Age | Gleason | %CD44 <sup>+</sup> <sup>b</sup>                                                                                | Purification <sup>c</sup> | Purity (%) <sup>d</sup>                            |
|--------------------------|-----|---------|----------------------------------------------------------------------------------------------------------------|---------------------------|----------------------------------------------------|
| HPCa57                   | 53  | 7 (3+4) | 50                                                                                                             | MACS                      | CD44 <sup>+</sup> : 69<br>CD44 <sup>-</sup> : 95   |
| HPCa60                   | 54  | 8 (3+5) | 8.7                                                                                                            | MACS                      | CD44 <sup>+</sup> : ~50<br>CD44 <sup>-</sup> : N.A |
| HPCa61                   | 56  | 6 (3+3) | 5.0                                                                                                            | MACS                      | CD44 <sup>+</sup> : N.A<br>CD44 <sup>-</sup> : 25  |
| HPCa62                   | 59  | 7 (4+3) | 2.4                                                                                                            | MACS                      | CD44 <sup>+</sup> : ~50<br>CD44 <sup>-</sup> : 100 |
| HPCa65                   | 59  | 7 (4+3) | 19.9                                                                                                           | MACS                      | CD44 <sup>+</sup> : 67<br>CD44 <sup>-</sup> : 100  |
| HPCa66                   | 58  | 6 (3+3) | 15.0                                                                                                           | FACS                      | CD44 <sup>+</sup> : NA<br>CD44 <sup>-</sup> : 94   |
| HPCa72                   | 58  | 7 (3+4) | 10.2                                                                                                           | MACS                      | CD44 <sup>+</sup> : 33<br>CD44 <sup>-</sup> : 100  |
| HPCa74                   | 59  | 7 (3+4) | 16.2                                                                                                           | MACS                      | CD44 <sup>+</sup> : 70<br>CD44 <sup>-</sup> : 100  |
| HPCa76                   | 64  | 7 (4+3) | 0.02                                                                                                           | MACS                      | CD44 <sup>+</sup> : ~10<br>CD44 <sup>-</sup> : 100 |
| HPCa77                   | 46  | 6 (3+3) | 14.2                                                                                                           | MACS                      | CD44 <sup>+</sup> : 45<br>CD44 <sup>-</sup> : 100  |
| HPCa78                   | 64  | 7 (3+4) | 19.2                                                                                                           | MACS                      | CD44 <sup>+</sup> : 45<br>CD44 <sup>-</sup> : 100  |
| HPCa79                   | 67  | 7 (4+3) | 8.2                                                                                                            | MACS                      | CD44 <sup>+</sup> : 15<br>CD44 <sup>-</sup> : 100  |
| HPCa80                   | 65  | 9 (4+5) | 4.4                                                                                                            | MACS                      | CD44 <sup>+</sup> : 13<br>CD44 <sup>-</sup> : 85   |
| HPCa81                   | 54  | 7 (3+4) | 20.9                                                                                                           | MACS                      | CD44 <sup>+</sup> : 64<br>CD44 <sup>-</sup> : 90   |
| HPCa87*                  | 57  | 9 (4+5) | N.D                                                                                                            | MACS                      | CD44 <sup>+</sup> : 93<br>CD44 <sup>-</sup> : 100  |
| HPCa89                   | 55  | 9 (4+5) | 24                                                                                                             | MACS                      | CD44 <sup>+</sup> : 87<br>CD44 <sup>-</sup> : 90   |
| HPCa91*                  | 60  | 8 (3+5) | N.D                                                                                                            | MACS                      | CD44 <sup>+</sup> : 95<br>CD44 <sup>-</sup> : 90   |
| HPCa93                   | 58  | 7 (4+3) | 0.99                                                                                                           | FACS                      | CD44 <sup>+</sup> : 87<br>CD44 <sup>-</sup> : 100  |
| HPCa98                   | 64  | 8 (3+5) | 5.74                                                                                                           | FACS                      | CD44 <sup>+</sup> : 79<br>CD44 <sup>-</sup> : 100  |
| HPCa102                  | 55  | 6 (3+3) | 24.8                                                                                                           | FACS                      | CD44 <sup>+</sup> : 99<br>CD44 <sup>-</sup> : 85   |
| <hr/>                    |     |         |                                                                                                                |                           |                                                    |
| HPCa194                  | 69  | 7 (3+4) | Used in sphere formation and clonal assays (Fig. S2a)                                                          |                           |                                                    |
| HPCa196                  | 47  | 7 (4+3) | Used in sphere formation and clonal assays (Fig. S2a)                                                          |                           |                                                    |
| HPCa202                  | 61  | 7 (3+4) | Used in sphere formation and clonal assays (Fig. 1k-m)                                                         |                           |                                                    |
| HPCa203                  | 67  | 9 (4+5) | Used in invasion assays (Fig. S3c)                                                                             |                           |                                                    |
| HPCa217                  | 53  | 7 (3+4) | Used in sphere formation and invasion assays (Repeat experiments; data not shown)                              |                           |                                                    |
| HPCa218                  | 62  | 7 (4+3) | Used in qPCR of EMT markers in CD44 <sup>+</sup> / <sup>-</sup> populations, and In invasion assays (Fig. S3j) |                           |                                                    |

<sup>a</sup>Primary HPCa samples were obtained from the robotic (Da Vinci) surgery with patient's consent. The age and Gleason score of each tumor are indicated. \*indicates primary xenografts. Sample HPCa60 – HPCa102 were used in purifying out CD44<sup>+</sup>/CD44<sup>-</sup> cells for validation of miR-141 expression (Fig. 1c). Samples HPCa194 – HPCa218 (below) were used in other functional assays as indicated.

<sup>b</sup>The % of CD44<sup>+</sup> HPCa cells was determined by flow analysis prior to sorting. N.D, not determined.

<sup>c</sup>CD44<sup>+</sup> and CD44<sup>-</sup> cells were purified out using MACS (magnetic cell sorting) or FACS (fluorescence activated cell sorting).

<sup>d</sup>The purity of MACS-purified cells, determined by counting CD44<sup>+</sup> cells under a fluorescence microscope, was variable for both CD44<sup>+</sup> and CD44<sup>-</sup> cell populations. The purity of FACS-purified cells, determined by post-sort flow analysis, was ~80-99% for CD44<sup>+</sup> HPCa cells and 85-100% for CD44<sup>-</sup> cells.

**Supplementary Table 3. Antibodies and siRNAs used in this study.**

| <b>Antibody</b> | <b>Company</b> | <b>Catalog number</b> | <b>Dilution</b> |
|-----------------|----------------|-----------------------|-----------------|
| Actin           | Sigma          | A1978                 | 1:2,500         |
| ARPC5           | Abnova         | H00010092-A01         | 1:1,000         |
| CD44            | AbCam          | Ab51037               | 1:500           |
| CDC42           | Cell Signaling | 2466                  | 1:1,000         |
| CDC42EP3        | Abnova         | H00010602-A01         | 1:100           |
| E-Cadherin      | Santa Cruz     | SC-7870               | 1:1,000         |
| EZH2            | Cell Signaling | 5246                  | 1:1,000         |
| GAPDH           | Santa Cruz     | SC-25778              | 1:1,000         |
| H3              | Cell Signaling | 9715S                 | 1:3,000         |
| H3K27me3        | Millipore      | 07-449                | 1:500           |
| RAC1            | Cell Signaling | 2465                  | 1:1,000         |
| SUZ12           | Cell Signaling | 3737                  | 1:1,000         |
| ZEB1            | Cell Signaling | 3396                  | 1:1,000         |

| <b>siRNA</b> | <b>Company</b> | <b>Catalog #</b> | <b>Sequence</b>                                                                     |
|--------------|----------------|------------------|-------------------------------------------------------------------------------------|
| siRac1       | Origene        | SR303958         | GGAACUAAACUUGAUCUUAGGGATG<br>ACAUUGUACUGUAAUGGAGUGAGCG<br>GUAGUUCUCAGAUGCGUAAAGCAGA |
| siCDC42      | Origene        | SR300714         | ACAAAUUCCAUCGGAUAUGUACC<br>CCACAAACAGAUGUAUUUCUAGUCT<br>GGAGAACCAUAUACUCUUGGACUTT   |
| siEZH2       | Origene        | SR301494         | AGGAUACAGACAGUGAUAGGGAAGC<br>GGCACUUACUAUGACAAUUCUGTG<br>GCUCUAGACAACAAACCUUGUGGAC  |

**Supplementary Table 4. HPCa and benign samples used in Fig. S8h.**

| <b>HPCa#</b> | <b>Gleason</b> | <b>Age</b> | <b>Tumor Stage</b>                   |
|--------------|----------------|------------|--------------------------------------|
| HPCa157T     | 7 (4+3)        | 53         | pT3a, pN0 (50% tumor involvement)    |
| HPCa154T     | 9 (4+5)        | 63         | pT3b, pN0 (100% tumor involvement)   |
| HPCa166T     | 7 (4+3)        | 53         | pT3a, pN0 (50-60% tumor involvement) |
| HPCa171T     | 7 (4+3)        | 61         | pT2c, pN0                            |
| HPCa172T     | 7 (4+3)        | 61         | pT2c, pN0 (20% tumor involvement)    |
| HPCa178T     | 9 (5+4)        | 68         | pT3a, pN0 (60% tumor involvement)    |
| HPCa216T     | 7 (3+4)        | 61         | pT2c, pN0 (20% tumor involvement)    |
| HPCa218T     | 7 (4+3)        | 62         | pT3b, pN0 (15% tumor involvement)    |
| HPCa227T     | 7              | 66         | N/A                                  |
| HPCa228T     | 7 (4+3)        | 71         | N/A (20% tumor involvement)          |
| HPCa231T     | 7 (4+3)        | 72         | pT3b, pN0 (50% tumor involvement)    |
| HPCa163N     |                | 62         | Normal/benign tissue                 |
| HPCa164N     |                | 54         | Normal/benign tissue                 |
| HPCa165N     |                | 75         | Normal/benign tissue                 |
| HPCa172N     |                | 61         | Normal/benign tissue                 |
| HPCa174N     |                | 69         | Normal/benign tissue                 |
| HPCa175N     |                | 67         | Normal/benign tissue                 |
| HPCa176N     |                | 62         | Normal/benign tissue                 |

## Supplementary Note 1

### Whole-genome RNA-Seq analysis in LAPC9 reveals similar signaling molecules and pathways targeted by miR-141 to those in DU145 cells

We also performed whole-genome RNA-Seq analysis in xenograft-derived LAPC9 cells ([Supplementary Fig. 6](#)) transfected with miR-141 and NC oligos (30 nM; 48 h). Of the 13,813 mapped genes, we identified 724 DEGs (FDR<0.05) including 459 down- and 265 up-regulated genes ([Supplementary Fig. 6a](#); [Supplementary Data 3](#)). Functional annotations of the 459 downregulated genes revealed “Metastasis-associated” gene category to be a major class affected by miR-141 ([Supplementary Fig. 6b](#)). Similar to in DU145 cells, IPA demonstrated that miR-141 expression in LAPC9 cells impacted multiple pathways involved in actin cytoskeleton, adherens junction, and Cdc42/RhoA signaling ([Supplementary Fig. 6c](#), shaded). Furthermore, miR-141 prominently upregulated many epithelial markers including E-Cadherin, Claudin members and KRTs while downregulated TGFB2, ZEB1, MAP2K4, VIM, NYH10, FN1 and many other mesenchymal genes ([Supplementary Fig. 6d](#)). GSEA positively correlated the miR-141 induced gene expression profile in LAPC9 cells with those in luminal (i.e., differentiated epithelial) breast cancer cells (data not shown).

We then merged the LAPC9 RNA-Seq data with the miR-200a CLIP-Seq data and found 157 putative direct targets of miR-141 in LAPC9 cells ([Supplementary Fig. 6a](#); [Supplementary Data 4](#)). Remarkably, 26 of the top 35 downregulated genes, including CDK6, CDC42EP3, and PADH1 that harbor the miR-141 binding site(s) were commonly found in DU145 cells ([Supplementary Fig. 6e](#), marked in red; [Supplementary Fig. 7a-h](#)). Finally, we found that the miR-141-induced gene expression profile in LAPC9 cells was associated with two data sets of “EZH2 Targets Downregulated” ([Supplementary Fig. 6f](#)).

Overall, miR-141 in LAPC9 cells elicits very similar gene expression changes and prominently targets genes involved in Rho GTPases, actin dynamics, EMT, and metastasis.
